# Supplementary material for: Positive psychological well-being predicts lower severe pain in the general population: a 2-year follow-up study of the SwePain cohort
Source: Springer Nature journal article supplement (doi:10.1186/s12991-019-0231-9), 2019-05-31

T1

■ CPG-IV (n=56)    ■ CPG-III (n=59)    ■ CPG-II (n=291)  
■ CPG-I (n=642)    ■ CPG-0 (n=4645)

Life satisfaction

Psychological well-being

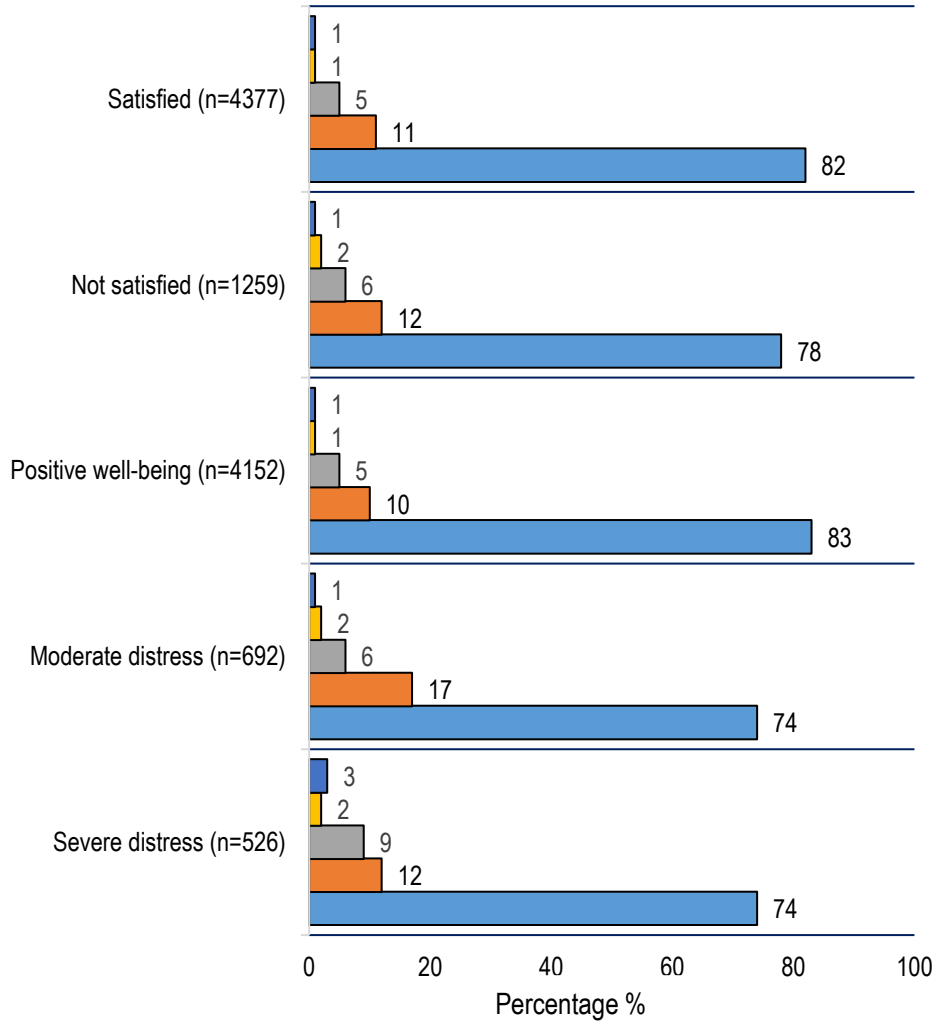

Supplement: MOESM2 [file 16763928]
