# Supplementary material for: Positive psychological well-being predicts lower severe pain in the general population: a 2-year follow-up study of the SwePain cohort
Source: Springer Nature journal article supplement (doi:10.1186/s12991-019-0231-9), 2019-05-31

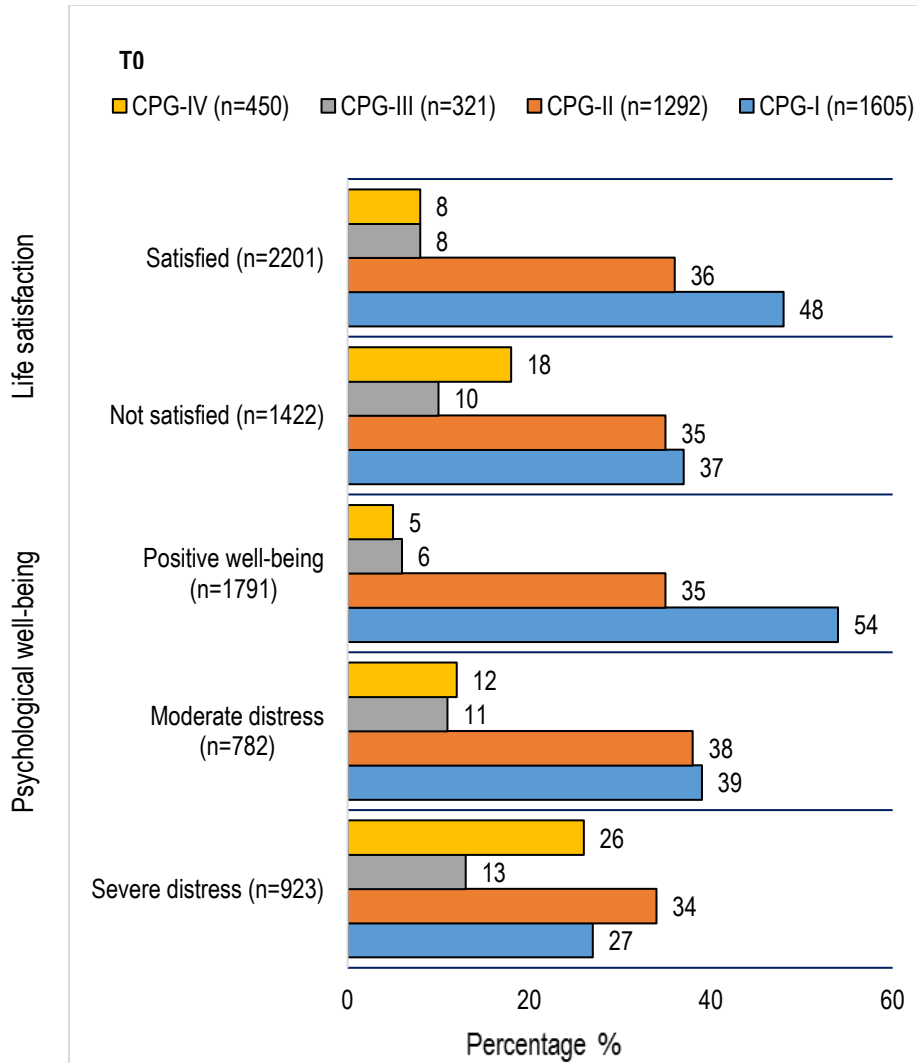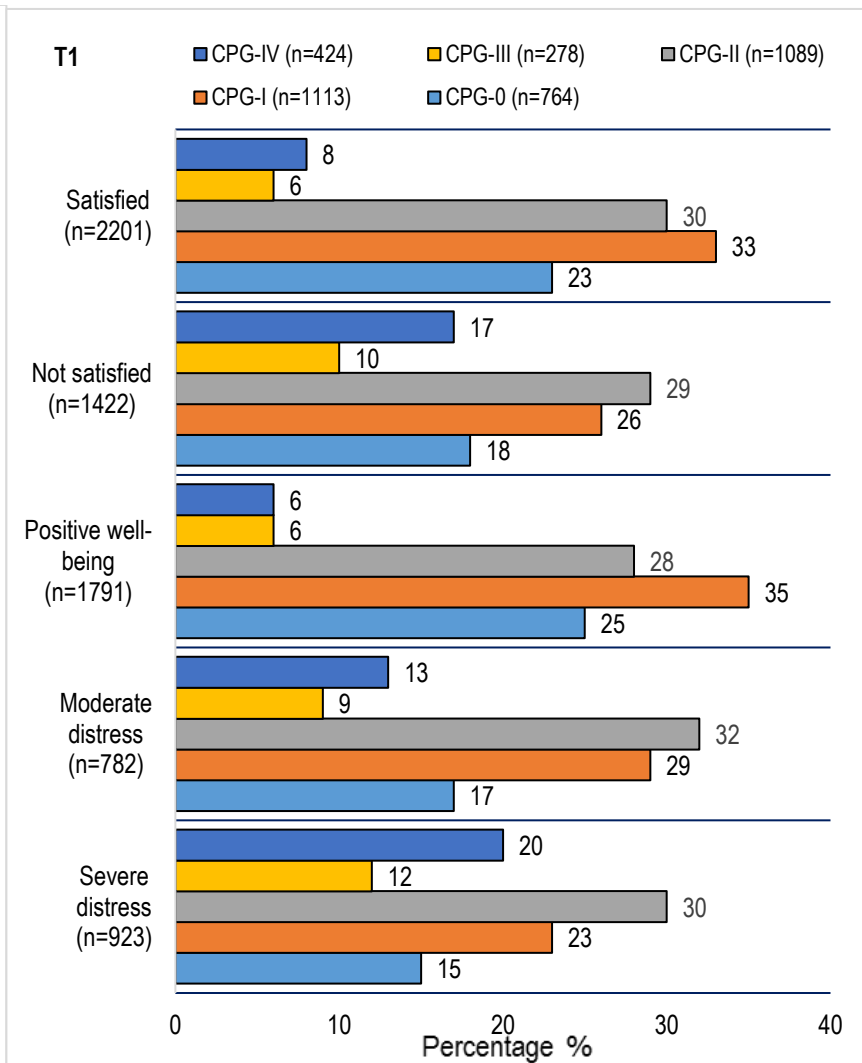

Supplement: MOESM3 [file 16763928]
